# Supplementary material
Source: publisher site journal article supplement (https://www.spandidos-publications.com/1728/downloadSupplementary)
Supplement: Supplementary file 1 [file downloadSupplementary]

Table SI. Pathological characteristics of patients with liver cancer enrolled in the present study.

| Case no. | Age, years | Sex    | Cirrhosis | Hepatitis type | Diagnosis date |
|----------|------------|--------|-----------|----------------|----------------|
| 1        | 62         | Female | Yes       | C              | May 2013       |
| 2        | 55         | Female | No        | C              | May 2013       |
| 3        | 70         | Male   | Yes       | B              | May 2013       |
| 4        | 66         | Female | Yes       | C              | June 2013      |
| 5        | 74         | Male   | Yes       | NA             | July 2013      |
| 6        | 48         | Male   | No        | C              | July 2013      |
| 7        | 57         | Male   | Yes       | C              | July 2013      |
| 8        | 60         | Female | Yes       | B              | July 2013      |
| 9        | 63         | Male   | Yes       | C              | August 2013    |
| 10       | 68         | Male   | No        | C              | August 2013    |
| 11       | 75         | Female | Yes       | B              | September 2013 |
| 12       | 39         | Female | Yes       | C              | September 2013 |
| 13       | 52         | Male   | No        | C              | September 2013 |
| 14       | 58         | Female | Yes       | C              | September 2013 |
| 15       | 59         | Male   | Yes       | B              | October 2013   |
| 16       | 66         | Male   | Yes       | B              | October 2013   |
| 17       | 64         | Male   | Yes       | NA             | November 2013  |
| 18       | 44         | Female | No        | C              | November 2013  |
| 19       | 72         | Female | Yes       | NA             | November 2013  |
| 20       | 53         | Female | Yes       | C              | December 2013  |
| 21       | 58         | Male   | Yes       | C              | December 2013  |
| 22       | 62         | Male   | No        | C              | January 2014   |
| 23       | 67         | Female | Yes       | B              | January 2014   |
| 24       | 46         | Male   | Yes       | C              | February 2014  |
| 25       | 58         | Female | Yes       | NA             | March 2014     |
| 26       | 50         | Male   | No        | C              | March 2014     |
| 27       | 68         | Male   | Yes       | C              | March 2014     |
| 28       | 64         | Male   | No        | B              | March 2014     |
| 29       | 72         | Female | Yes       | NA             | May 2014       |
| 30       | 54         | Male   | Yes       | C              | May 2014       |
| 31       | 75         | Female | Yes       | C              | June 2014      |
| 32       | 65         | Male   | Yes       | NA             | June 2014      |
| 33       | 59         | Male   | No        | B              | June 2014      |
| 34       | 68         | Male   | No        | C              | June 2014      |
| 35       | 45         | Female | Yes       | C              | July 2014      |
| 36       | 69         | Female | Yes       | NA             | July 2014      |
| 37       | 53         | Female | Yes       | C              | August 2014    |
| 38       | 67         | Male   | Yes       | NA             | August 2014    |
| 39       | 64         | Female | No        | C              | August 2014    |
| 40       | 73         | Male   | Yes       | NA             | September 2014 |
| 41       | 75         | Male   | Yes       | C              | September 2014 |
| 42       | 50         | Male   | Yes       | C              | September 2014 |
| 43       | 59         | Female | No        | C              | September 2014 |
| 44       | 64         | Male   | No        | B              | September 2014 |
| 45       | 71         | Female | Yes       | NA             | October 2014   |
| 46       | 48         | Female | Yes       | C              | October 2014   |
| 47       | 63         | Male   | Yes       | C              | October 2014   |
| 48       | 38         | Male   | No        | C              | October 2014   |
| 49       | 59         | Female | Yes       | C              | October 2014   |
| 50       | 65         | Male   | Yes       | C              | October 2014   |

NA, not applicable.
